# Supplementary material
Source: PubMed Central journal article supplement (PMC3959865)

Figure S1.

A.

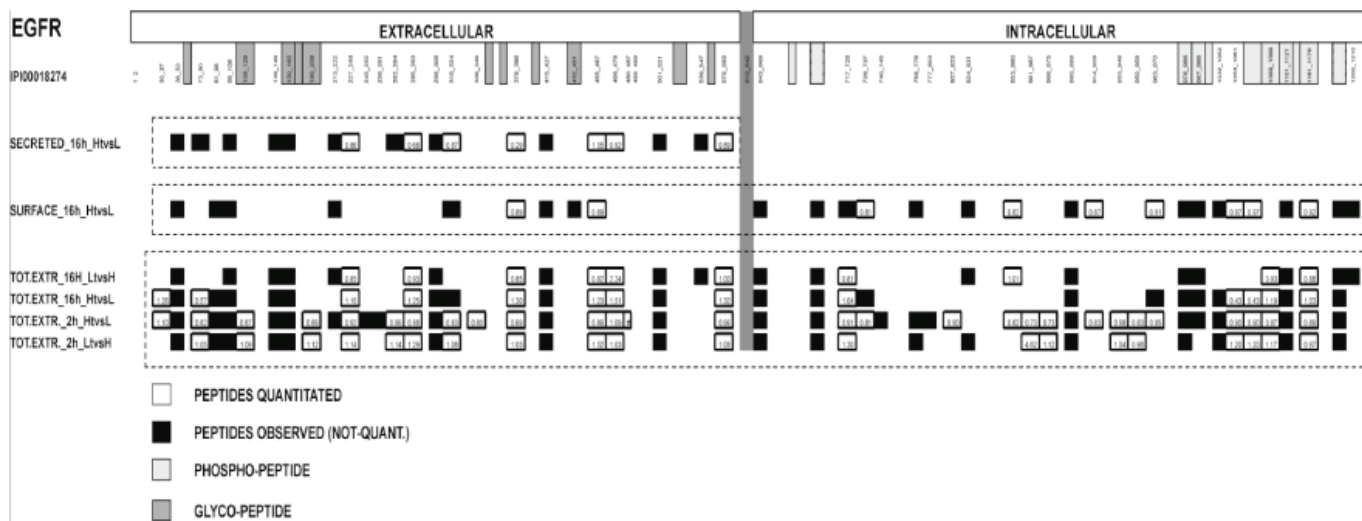

B.

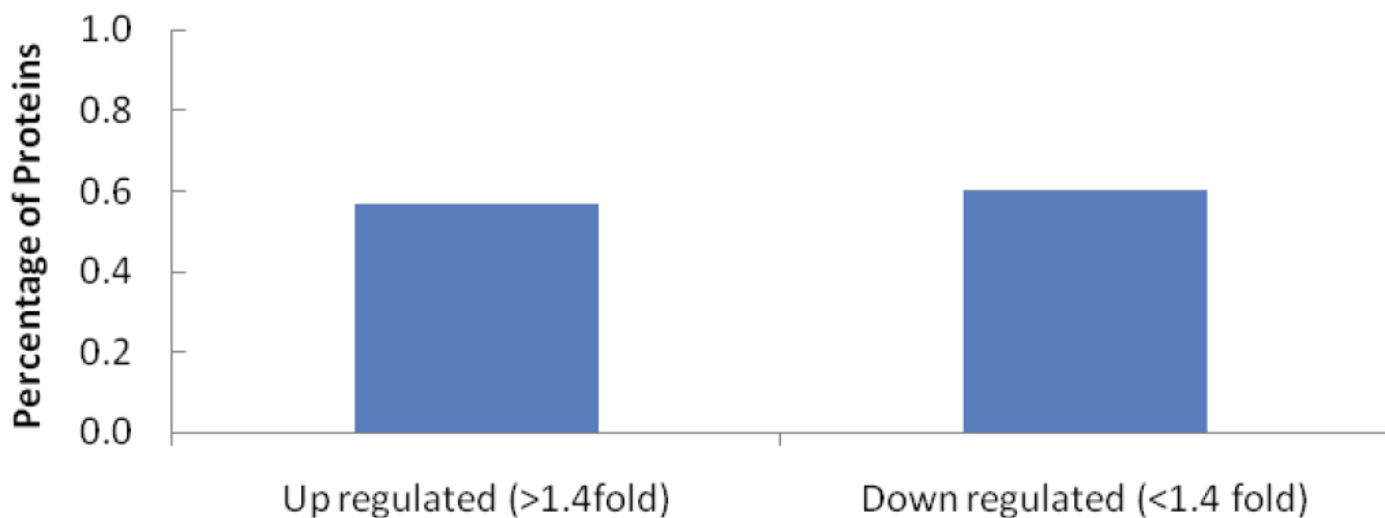

C.

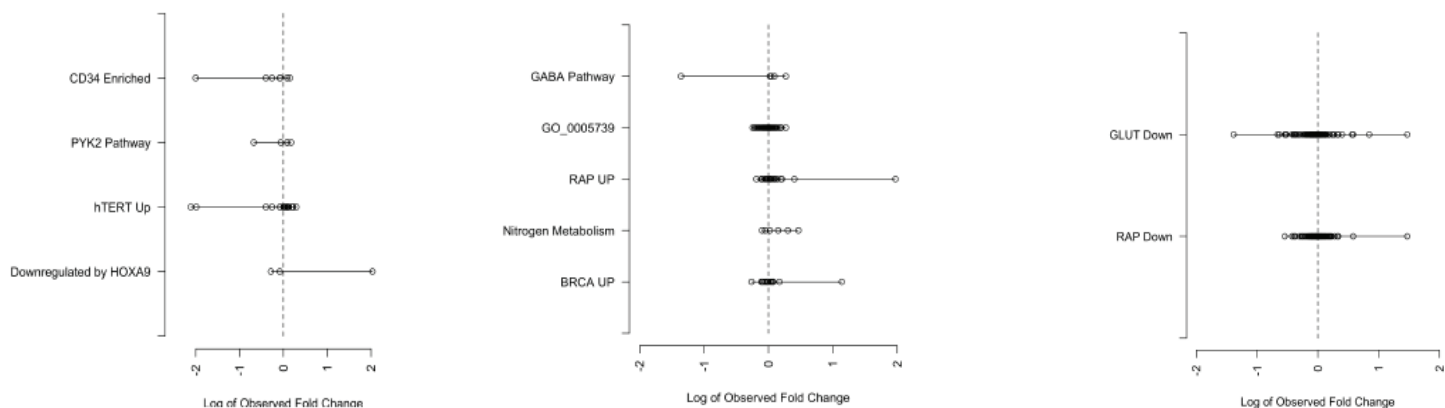

Supplement: NIHMS363546-supplement-5.pdf [file NIHMS363546-supplement-5.pdf]

Figure S2.

A.

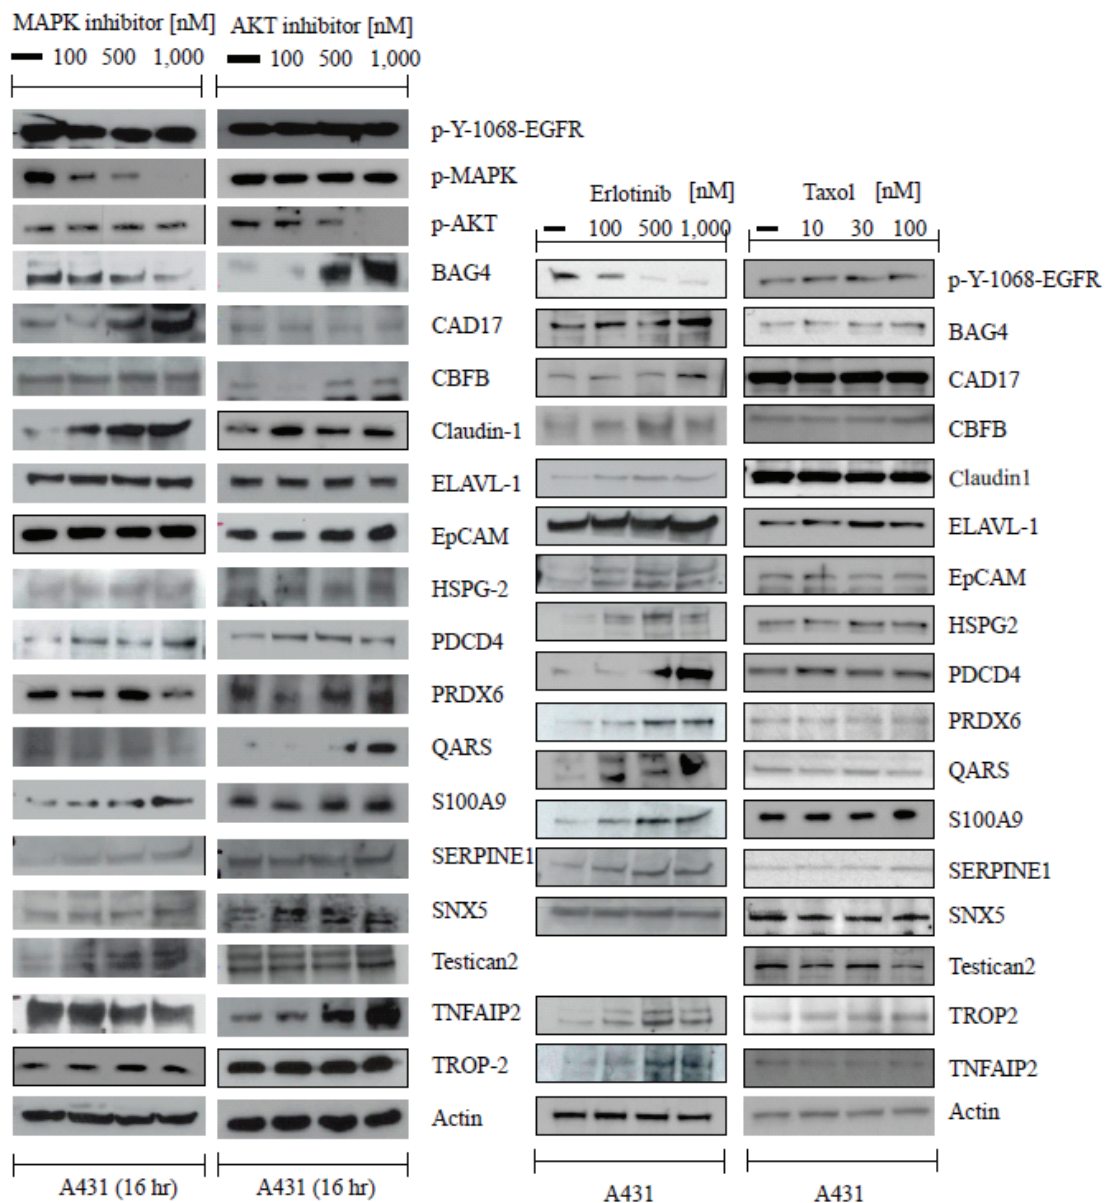

B.

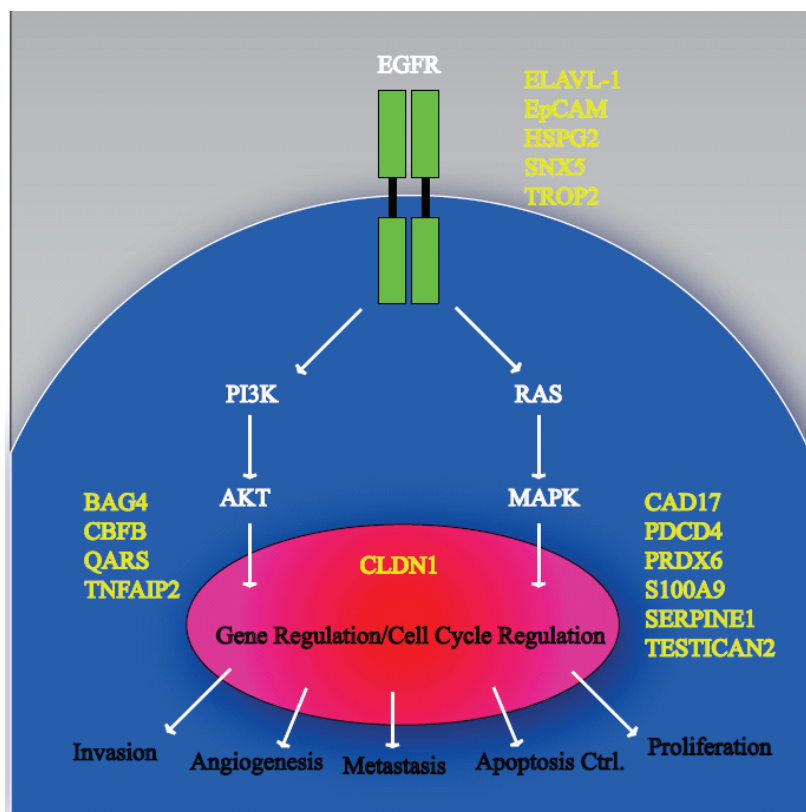

Supplement: NIHMS363546-supplement-6.pdf [file NIHMS363546-supplement-6.pdf]

Figure S3.

A.

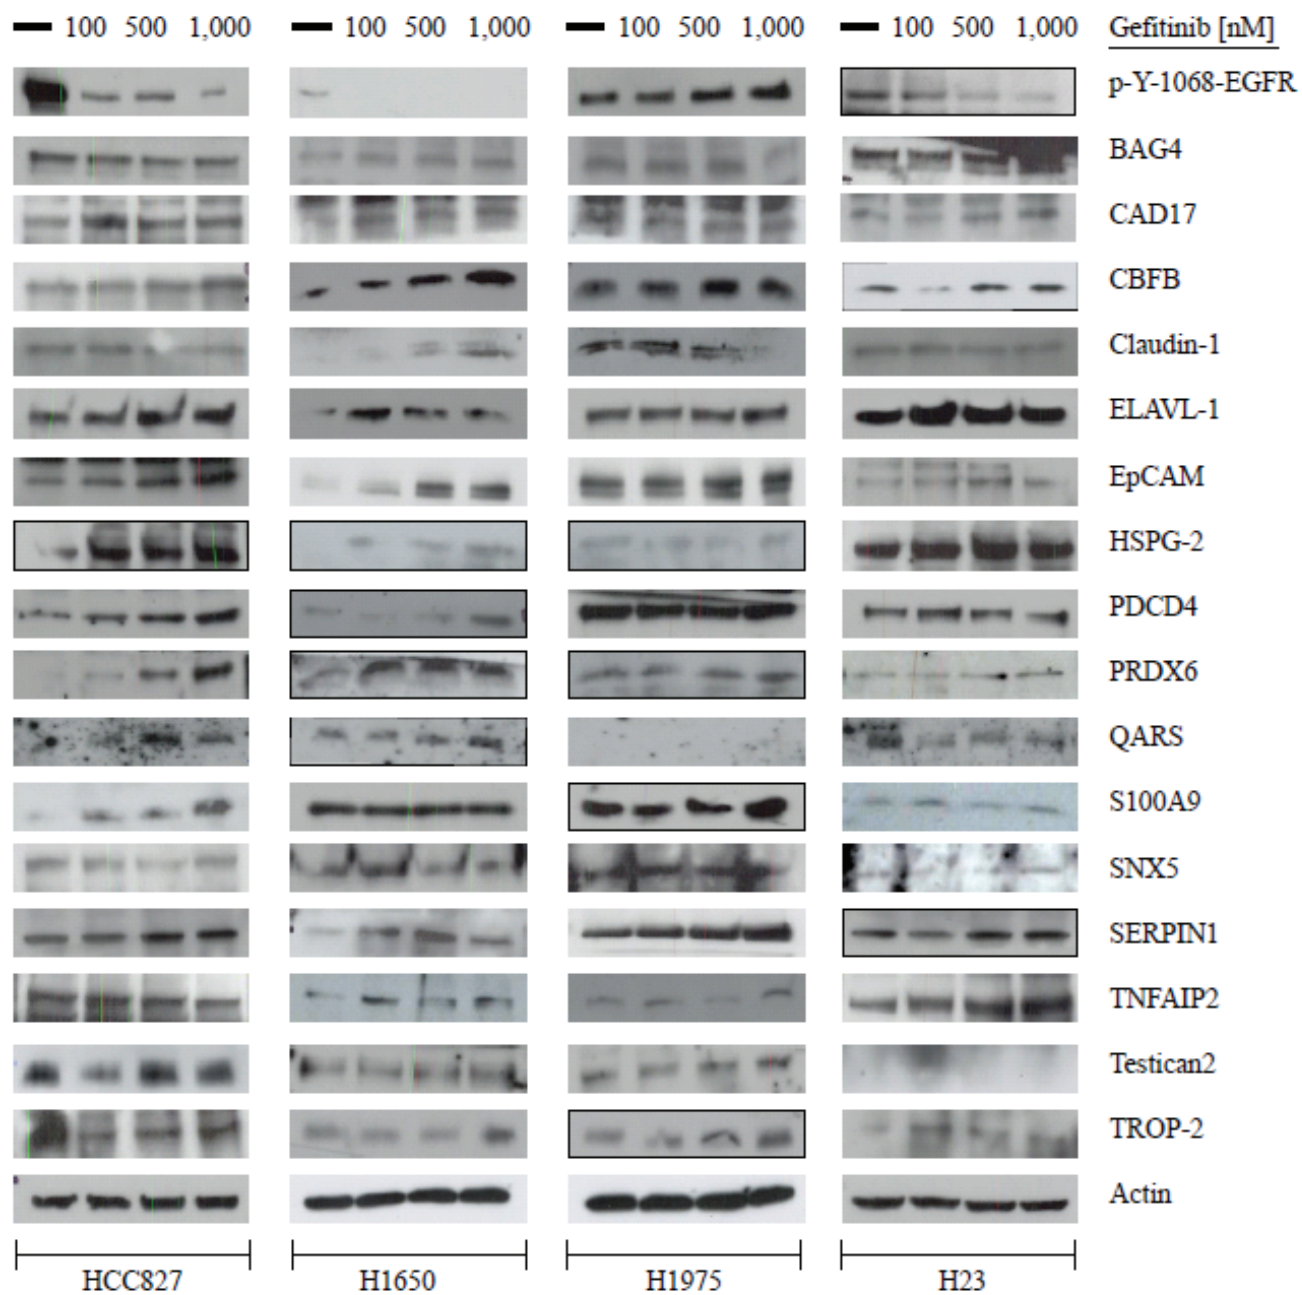

B.

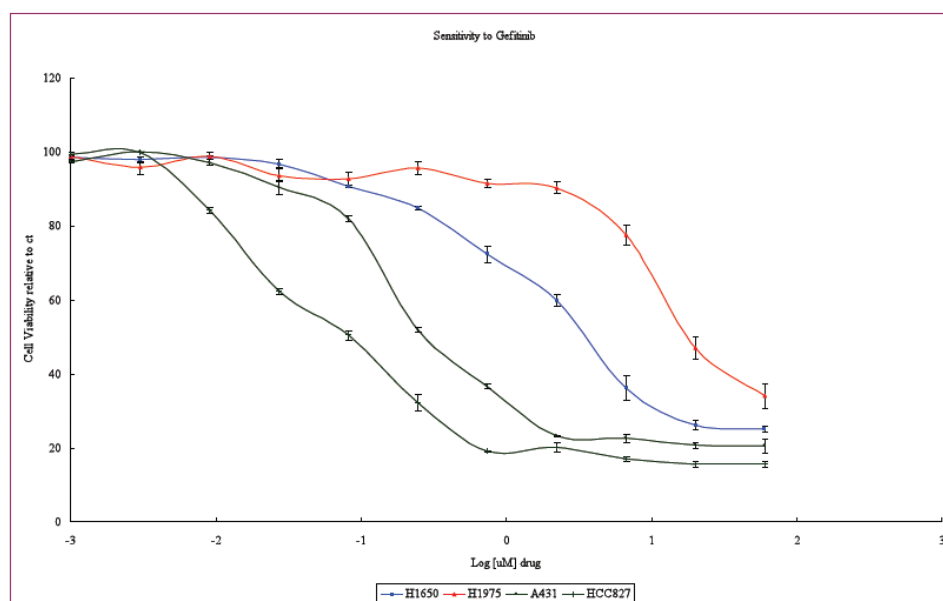

Supplement: NIHMS363546-supplement-7.pdf [file NIHMS363546-supplement-7.pdf]
